# Supplementary material for: The Pharmacological Effect of Hemin in Inflammatory-Related Diseases: A Systematic Review
Source: MDPI journal article supplement (doi:10.3390/biomedicines12040898), 2024-04-18
Supplement: s1 [file s1]

## Supplementary Material

Comprehensive search expression applied in the biomedical electronic bases MEDLINE (Pubmed), Web of Science and Scopus, including the results obtained:

### MEDLINE (PubMed) - Research expression:

((hemin[MeSH Terms]) OR (hemin[Title/Abstract])) AND ((inflammation[MeSH Terms]) OR (inflammat\*[Title/Abstract])) AND ((disease models, animal[MeSH Terms]) OR ("animal model\*") OR ("disease model\*") OR ("animal experimentation\*") OR ("nonclinical stud\*") OR ("non-clinical stud\*") OR ("preclinical stud\*") OR ("pre-clinical stud\*") OR ("in vivo") OR (rat\*[Title/Abstract]) OR (mouse[Title/Abstract]) OR (mice[Title/Abstract]) OR (rodent\*[Title/Abstract]))

Pubmed - Results: 272 results at March 7th 2023

### Web of Science - Research expression:

(TI=(hemin)) OR (AB=(hemin)) AND (TI=(inflammat\*)) OR (AB=(inflammat\*)) AND (ALL=("animal model\*")) OR (ALL=("disease model\*")) OR (ALL=("animal experimentation\*")) OR (ALL=("nonclinical stud\*")) OR (ALL=("non-clinical stud\*")) OR (ALL=("preclinical stud\*")) OR (ALL=("pre-clinical stud\*")) OR (ALL=("in vivo")) OR (TI=(rat\*)) OR (AB=(rat\*)) OR (TI=(mouse)) OR (AB=(mouse)) OR (TI=(mice)) OR (AB=(mice)) OR (TI=(rodent\*)) OR (AB=(rodent\*))

Web of science - Results: 283 results at March 7th 2023

### Scopus - Research expression:

TITLE-ABS-KEY (hemin) AND TITLE-ABS-KEY (inflammat\*) AND ALL ("animal model\*") OR ALL ("disease model\*") OR ALL ("animal experimentation\*") OR ALL ("nonclinical stud\*") OR ALL ("non-clinical stud\*") OR ALL ("preclinical stud\*") OR ALL ("pre-clinical stud\*") OR ALL ("in vivo") OR TITLE-ABS-KEY (rat\*) OR TITLE-ABS-KEY (mouse) OR TITLE-ABS-KEY (mice) OR TITLE-ABS-KEY (rodent\*)

Scopus - Results: 555 results at March 7th 2023

Table S1. Application of the SYRCLE's tool for assessing the risk of bias in each included study.

| Ref. | Sequence generation | Baseline characteristics | Allocation concealment | Random housing | Blinding (Performance bias) | Random outcome assessment | Blinding (Detection bias) | Incomplete outcome data | Selective outcome reporting | Other sources of bias | Total |
|------|---------------------|--------------------------|------------------------|----------------|-----------------------------|---------------------------|---------------------------|-------------------------|-----------------------------|-----------------------|-------|
| 37   | 1                   | 2                        | 2                      | 2              | 2                           | 2                         | 2                         | 2                       | 2                           | 2                     | 18    |
| 21   | 1                   | 2                        | 2                      | 2              | 0                           | 2                         | 0                         | 2                       | 2                           | 2                     | 15    |
| 22   | 1                   | 2                        | 2                      | 2              | 0                           | 2                         | 0                         | 2                       | 2                           | 2                     | 15    |
| 32   | 0                   | 1                        | 2                      | 2              | 0                           | 2                         | 2                         | 2                       | 2                           | 2                     | 15    |
| 46   | 0                   | 1                        | 2                      | 2              | 0                           | 2                         | 2                         | 2                       | 2                           | 2                     | 15    |
| 42   | 0                   | 2                        | 2                      | 2              | 2                           | 1                         | 0                         | 1                       | 2                           | 2                     | 14    |
| 53   | 0                   | 2                        | 2                      | 2              | 0                           | 2                         | 0                         | 2                       | 2                           | 2                     | 14    |
| 18   | 0                   | 2                        | 2                      | 2              | 0                           | 1                         | 2                         | 1                       | 2                           | 2                     | 14    |
| 47   | 0                   | 2                        | 2                      | 0              | 0                           | 2                         | 1                         | 2                       | 2                           | 2                     | 13    |
| 33   | 0                   | 2                        | 2                      | 2              | 0                           | 2                         | 1                         | 2                       | 1                           | 1                     | 13    |
| 59   | 0                   | 1                        | 2                      | 2              | 0                           | 2                         | 0                         | 2                       | 2                           | 2                     | 13    |
| 52   | 0                   | 1                        | 2                      | 2              | 0                           | 2                         | 0                         | 2                       | 2                           | 2                     | 13    |
| 25   | 0                   | 1                        | 2                      | 2              | 0                           | 2                         | 0                         | 2                       | 2                           | 2                     | 13    |
| 50   | 1                   | 2                        | 2                      | 2              | 0                           | 1                         | 0                         | 1                       | 2                           | 2                     | 13    |
| 20   | 0                   | 2                        | 2                      | 2              | 0                           | 2                         | 0                         | 2                       | 1                           | 2                     | 13    |
| 51   | 0                   | 1                        | 1                      | 2              | 0                           | 2                         | 0                         | 2                       | 2                           | 2                     | 12    |
| 57   | 0                   | 1                        | 1                      | 2              | 0                           | 2                         | 0                         | 2                       | 2                           | 2                     | 12    |
| 8    | 0                   | 2                        | 2                      | 2              | 0                           | 2                         | 0                         | 0                       | 2                           | 2                     | 12    |
| 24   | 0                   | 2                        | 2                      | 2              | 0                           | 1                         | 0                         | 1                       | 2                           | 2                     | 12    |
| 60   | 0                   | 1                        | 1                      | 2              | 0                           | 2                         | 0                         | 1                       | 2                           | 2                     | 11    |
| 44   | 0                   | 2                        | 1                      | 2              | 0                           | 1                         | 0                         | 1                       | 2                           | 2                     | 11    |
| 7    | 0                   | 2                        | 2                      | 0              | 0                           | 1                         | 1                         | 1                       | 2                           | 2                     | 11    |
| 41   | 0                   | 1                        | 2                      | 2              | 0                           | 1                         | 0                         | 1                       | 2                           | 2                     | 11    |
| 61   | 0                   | 1                        | 2                      | 2              | 0                           | 1                         | 0                         | 1                       | 2                           | 2                     | 11    |
| 27   | 0                   | 1                        | 2                      | 2              | 0                           | 1                         | 0                         | 1                       | 2                           | 2                     | 11    |
| 55   | 0                   | 1                        | 2                      | 2              | 0                           | 1                         | 0                         | 1                       | 2                           | 2                     | 11    |
| 58   | 0                   | 1                        | 2                      | 2              | 0                           | 1                         | 0                         | 1                       | 2                           | 2                     | 11    |

|    |   |   |   |   |   |   |   |   |   |   |    |
|----|---|---|---|---|---|---|---|---|---|---|----|
| 54 | 0 | 1 | 1 | 2 | 0 | 1 | 1 | 1 | 2 | 2 | 11 |
| 23 | 0 | 0 | 1 | 2 | 0 | 1 | 1 | 1 | 2 | 2 | 10 |
| 56 | 0 | 2 | 1 | 2 | 0 | 1 | 0 | 1 | 1 | 2 | 10 |
| 62 | 0 | 1 | 1 | 0 | 0 | 2 | 0 | 2 | 2 | 2 | 10 |
| 63 | 0 | 1 | 2 | 0 | 0 | 1 | 1 | 1 | 2 | 2 | 10 |
| 45 | 0 | 1 | 2 | 2 | 0 | 0 | 0 | 1 | 2 | 2 | 10 |
| 64 | 0 | 1 | 2 | 1 | 0 | 1 | 0 | 1 | 2 | 2 | 10 |
| 48 | 0 | 1 | 1 | 2 | 0 | 1 | 0 | 1 | 1 | 2 | 9  |
| 19 | 0 | 0 | 2 | 2 | 0 | 0 | 0 | 1 | 2 | 2 | 9  |
| 35 | 0 | 1 | 0 | 2 | 0 | 1 | 0 | 1 | 2 | 2 | 9  |
| 26 | 0 | 1 | 2 | 0 | 0 | 1 | 0 | 1 | 2 | 2 | 9  |
| 31 | 0 | 1 | 1 | 0 | 0 | 1 | 1 | 1 | 2 | 2 | 9  |
| 43 | 0 | 1 | 2 | 0 | 0 | 1 | 0 | 1 | 2 | 2 | 9  |
| 34 | 0 | 1 | 1 | 0 | 0 | 1 | 0 | 1 | 2 | 2 | 8  |
| 40 | 0 | 2 | 1 | 0 | 0 | 1 | 0 | 1 | 1 | 2 | 8  |
| 28 | 0 | 0 | 1 | 2 | 0 | 1 | 0 | 1 | 1 | 2 | 8  |
| 38 | 0 | 1 | 1 | 0 | 0 | 1 | 0 | 1 | 2 | 2 | 8  |
| 39 | 0 | 1 | 1 | 0 | 0 | 1 | 0 | 1 | 2 | 2 | 8  |
| 49 | 0 | 1 | 0 | 0 | 0 | 1 | 0 | 2 | 2 | 2 | 8  |
| 36 | 1 | 1 | 0 | 0 | 0 | 1 | 0 | 1 | 2 | 2 | 8  |
| 30 | 0 | 1 | 0 | 0 | 0 | 1 | 0 | 2 | 2 | 2 | 8  |
| 29 | 0 | 1 | 1 | 0 | 0 | 1 | 0 | 1 | 2 | 2 | 8  |
